# 1 **An omnidirectional visualization model of** 2 **personalized gene regulatory networks**

3  
4 **Chixiang Chen<sup>1,2</sup>, Libo Jiang<sup>3</sup>, Ming Wang<sup>1,2</sup>, Yaqun Wang<sup>4</sup>, Biyi Shen<sup>2</sup>, Zhenqiu Liu<sup>2</sup>,**  
5 **Zuoheng Wang<sup>5</sup>, Wei Hou<sup>6</sup>, Scott A. Berceci<sup>7,8,9</sup> and Rongling Wu<sup>1,2</sup>**

6  
7 <sup>1</sup>Center for Statistical Genetics, Departments of Public Health Sciences and Statistics,  
8 Pennsylvania State University, Hershey, PA 17033, USA

9 <sup>2</sup>Department of Public Health Sciences, Penn State College of Medicine, Hershey, PA 17033,  
10 USA

11 <sup>3</sup>Center for Computational Biology, College of Biological Sciences and Technology, Beijing  
12 Forestry University, Beijing 100083, China

13 <sup>4</sup>Department of Biostatistics and Epidemiology, Rutgers School of Public Health, Newark, NJ  
14 07101, USA

15 <sup>5</sup>Department of Biostatistics, Yale School of Public Health, New Haven, CT 06520, USA

16 <sup>6</sup>Department of Family, Population & Preventive Medicine, Stony Brook School of Medicine,  
17 Stony Brook, NY 11794, USA

18 <sup>7</sup>Malcom Randall VA Medical Center, Gainesville, FL 32610, USA

19 <sup>8</sup>Department of Surgery, University of Florida, Box 100128, Gainesville, FL, 32610, USA

20 <sup>9</sup>Department of Biomedical Engineering, University of Florida, Gainesville, FL 32610, USA

## 21 22 23 **Correspondence**

24 [rwu@phs.psu.edu](mailto:rwu@phs.psu.edu) (Rongling Wu), [bercesa@surgery.ufl.edu](mailto:bercesa@surgery.ufl.edu) (Scott Berceci)

25  
26  
27  
28  
29

## 30 **Abstract**

31 Gene regulatory networks (GRNs) have been widely used as a fundamental tool to reveal the  
32 genomic mechanisms that underlie the organism's response to environmental and developmental  
33 cues. Standard approaches infer GRNs as holistic graphs of gene co-expression, but such  
34 graphs cannot quantify how gene-gene interactions differentiate among organisms and how  
35 they alter structurally across spatiotemporal gradients. Here, we develop a generalized  
36 framework for inferring informative, dynamic, omnidirectional, and personalized GRNs  
37 (idopGRNs) from routine transcriptional experiments. This framework is constructed by a  
38 system of quasi-dynamic ordinary differential equations (qdODEs) derived from the combination  
39 of ecological and evolutionary theories. We reconstruct idopGRNs from a clinical genomic study  
40 and illustrate how network structure and organization affect surgical response to infrainguinal  
41 vein bypass grafting and the outcome of grafting. idopGRNs may shed light on genotype-  
42 phenotype relationships and provide valuable information for personalized medicine.

43

44 **Key words:** gene regulatory network, evolutionary game theory, niche biodiversity theory,  
45 community ecology, ordinary differential equation, variable selection

46

47

## 48 **Introduction**

49 Gene regulatory networks (GRNs) have been thought to operate as the genomic mechanisms  
50 that guide the organism's response to changes in their environment<sup>1,2</sup>. One promising subject  
51 of research in modern biology and translational medicine is how to infer biologically realistic  
52 and statistically robust GRNs from increasingly available transcriptional data and link them to  
53 physiological, pathological, and clinical characteristics<sup>3-5</sup>. A number of statistical approaches,  
54 such as Boolean networks<sup>6</sup>, Bayesian networks<sup>7</sup>, mutual information theory<sup>8,9</sup>, and graphical  
55 models<sup>10</sup>, have been developed for network inference, and these approaches visualize GRNs as  
56 probabilistic, undirected or unidirectional graphs, where each node represents a gene and edges  
57 depict relationships between genes. However, such graphs may not be sufficiently informative  
58 for charting the topological structure of a GRN because genes may regulate and also be regulated  
59 by other genes, with regulations in various signs and strengths and varying across time and space  
60 scales<sup>3,11</sup>.

61 As the time generalization of Bayesian networks, dynamic Bayesian networks (DBNs) can code  
62 cyclic, causally directed, and probabilistic interactions into networks through temporal  
63 interdependence, but they are often puzzled by the choice of granularity when time spaces vary<sup>12-</sup>  
64 <sup>14</sup>. When gene networks are modeled by a system of time-derivative ordinary differential  
65 equations (ODEs), all these issues can be mostly addressed<sup>15-18</sup>. The successful use of such ODE-  
66 based networks is, however, impaired by two factors: (1) parametric dynamic modeling, which is  
67 difficult to justify, given that gene expression is often stochastically fluctuated<sup>19,20</sup> and alters  
68 across discrete regimes, such as cell/tissue types and medical treatments<sup>21</sup>, and (2) the  
69 requirement of high-density temporal expression data over a time course<sup>22</sup>. Gene networks are  
70 regarded as temporal or spatial snapshots of biological processes<sup>23</sup>, but no existing approaches  
71 can contextualize how GRNs change structurally and functionally in response to developmental  
72 and environmental cues. More importantly, most approaches can only identify an overall  
73 network from a set of cross-sectional or longitudinal data, largely limiting the use of GRNs as a  
74 personalized tool for clinical diagnosis and prediction of individual subjects in the era of  
75 precision medicine.

76  
77 Here, we develop a statistical framework for inferring informative, dynamic, omnidirectional,  
78 and personalized GRNs (idopGRNs) from standard genomic experiments. An *informative*  
79 network should encapsulate bidirectional, signed, and weighted edges that facilitate the  
80 interpretation and interrogation of gene-gene interactions. A *dynamic* network can monitor how  
81 the pattern of gene co-expression alters in response to environmental and developmental change.  
82 An *omnidirectional* network codes all possible gene interactions but ensuring its sparsity and  
83 stability. Because of different genetic backgrounds, specific individuals may develop and use  
84 their *personalized* networks to regulate any phenotypic change. To recover such idopGRNs, we  
85 integrate elements of distinct disciplines into a unified framework by which expression data from  
86 multiple individuals under distinct treatments, monitored at several key time points and/or across  
87 spaces, can be assembled, modeled, and analyzed. We virtualize idopGRNs as an ecological  
88 community composed of many species, in which the expression level of each gene,  
89 corresponding to the abundance of each species, is determined by its niche and niche differences  
90 collectively stabilize the whole network through gene-gene interactions in a way similar to  
91 interspecies interactions<sup>24-26</sup>. We integrate the niche theory of biodiversity and evolutionary

92 game theory to derive a system of quasi-dynamic ordinary differential equations that model gene  
93 networks across individuals. The implementation of variable selection helps to define and select  
94 a subset of the most significant genes that regulate a focal gene, which enables the inference of  
95 sparse but omnidirectional networks. To test and validate our approach, we analyzed genomic  
96 data of circulating monocytes from human infrainguinal vein bypass grafting, aimed at treating  
97 lower extremity arterial occlusive disease<sup>27</sup>, and reconstructed graft- and outcome-perturbed  
98 idopGRNs. The usefulness of our approach is further validated by a second vein graft experiment  
99 for rabbits<sup>28</sup>. In both cases, quantitative comparison of GRN structure and organization between  
100 different outcomes and across times provides a mechanistic understanding of vein bypass graft  
101 success vs. failure.

102

### 103 **Theory Construct**

104 The theory for reconstructing idopGRNs is interdisciplinary, founded on the seamless integration  
105 of community ecology, evolutionary biology, and network science through mathematical and  
106 statistical reasoning. Each discipline contributes its distinct elements to a unified framework of  
107 statistical inference for gene networks.

108

### 109 **Niche theory of biodiversity**

110 The concept of niche was first defined by Elton<sup>29</sup> to describe the ecological components of a  
111 habitat related to a species' tolerance and requirement. This concept has been generalized to  
112 explain biodiversity and species coexistence patterns in ecological communities<sup>30</sup>. A gene  
113 network, residing in any biological entity, such as a cell, a tissue, or even an individual, can be  
114 viewed as an ecological community, in which the expression level of a constituent gene  
115 corresponds to the niche occupied by a species and niche differences form community diversity  
116 and stability. From a community ecology perspective, the total expression amount of all genes in  
117 the network reflects the carrying capacity of the entity to sustain indefinitely these genes and  
118 supply them with essential resources or energy for their function<sup>31</sup>, which are a mixture of many  
119 unknown factors. We define the total expression level of all genes on an entity as the expression  
120 index (EI) of this entity. This concept, similar to environmental index coined to describe the  
121 overall quality of site in terms of the accumulative growth of all plants<sup>32,33</sup>, can describe the  
122 overall occupation of all genes to the entity. By aligning EI values in an ascending order, we can

123 convert discrete entities to a series of continuous variables that help establish a system of  
124 ordinary differential equations (ODEs).

125  
126 In an ecological habitat, each organism needs to respond to the distribution of resources and  
127 competitors and it in turn alters those same factors<sup>34</sup>. For example, an organism would grow fast  
128 when resources are abundant, or when predators or parasites are scarce, and may limit access to  
129 resources by other organisms or provide a food source for predators. The types and numbers of  
130 environmental variables constituting the dimensions of a habitat vary from one species to another  
131 and the relative importance of particular environmental variables for a species may vary  
132 according to the geographic and biotic contexts<sup>35</sup>. Thus, based on the niche theory of  
133 biodiversity, the relationship of the abundance of a particular species (part) with the total  
134 abundance of all species (whole) across graded habitats can potentially describe and predict the  
135 inherent compositional structure of an ecological community and its response to environmental  
136 change. This part-whole relationship, governed by the power scaling theory, has been observed  
137 to pervade biology; For example, the power equation can well explain how total leaf biomass  
138 scales allometrically with whole-plant biomass across different plants<sup>36,37</sup> and how brain size of  
139 animals scales with whole-body mass across animals<sup>38,39</sup>. We introduce this power scaling theory  
140 to model how the expression of individual genes (part) scales with the total expression of all  
141 genes across EIs through a system of ODEs.

142

### 143 **Evolutionary game theory of gene expression**

144 In an ecological community where many species coexist, a species may adopt a cooperative or  
145 competitive decision to maximize its chance to access to resources<sup>40</sup>. This phenomenon has also  
146 been well recognized at the cell level in both humans and rats<sup>41,42</sup>, by which a cell determines a  
147 goal-directed decision-making based on its accrued knowledge of the environment. In an elegant  
148 study of stress impact, Friedman et al.<sup>43</sup> identified the cells and networks that enable a rodent to  
149 choose an appropriate strategy of responsiveness after evaluating possible costs and benefits.  
150 Such rational choice reasoning may also guide how genes, located in the same cell, promote or  
151 inhibit each other in a complex network. In other words, gene-gene interactions can be modeled  
152 as a game in which one player may choose to compete or cooperate with its opponents in a quest  
153 to maximize its payoff. Classic game theory, pioneered by mathematical economists<sup>44</sup>, suggests

154 that such choices are not arbitrary, but rather include a rational judgement based on a gene's own  
155 strategy and the strategies of other genes. However, it is extremely difficult or impossible to  
156 interrogate the rationality of genes, making a direct application of classic game theory to gene  
157 network inference infeasible. To address this issue, we introduce evolutionary game theory, a  
158 combination theory of game theory and evolutionary biology<sup>45</sup>, which does not rely on the  
159 rationality assumption when it is used to study community dynamics and evolution. In an  
160 evolving population, any strategy used by an individual to maximize its payoff would be  
161 constrained by strategies of other individuals that also strive to maximize their own payoffs and,  
162 ultimately, this process through natural selection would optimize the structure and organization  
163 of the population, making it reach maximum (best response) payoff<sup>45</sup>.

164

### 165 **Mathematical integration of evolutionary game theory and niche biodiversity theory**

166 Suppose we initiate a standard genomic experiment (Fig. 1A) involving  $S$  treatments, each with  
167  $n_s$  ( $s = 1, \dots, S$ ) subjects, measured for  $m$  genes and  $p$  phenotypic traits at a series of time points  
168 ( $t_0, t_1, \dots, t_T$ ), where  $t_0$  denotes pre-treatment and  $t_1, \dots, t_T$  denote post-treatment. We call a  
169 subject from a treatment measured at a time point a "sample." Thus, we have a total of  $N = (T +$   
170  $1)n$  samples, where  $n = \sum_{s=1}^S n_s$  is the total number of subjects from all treatments. Let  $M_{ji}$   
171 denote the expression level of gene  $j$  ( $j = 1, \dots, m$ ) on sample  $i$  ( $i = 1, \dots, N$ ). The EI of sample  $i$   
172 is defined as  $E_i = \sum_{j=1}^m M_{ji}$ . We line up the  $N$  samples in the ascending order of EI, which allows  
173 us to construct a system of ODEs, expressed as

$$\frac{dM_{ji}}{dE_i} = g_j(M_{ji}(E_i); \Theta_j) + \sum_{j'=1, j' \neq j}^m g_{j|j'}(M_{j'i}(E_i); \Theta_{j|j'}), j = 1, \dots, m; i = 1, \dots, N \quad (1)$$

174 where the change rate of the expression of gene  $j$  per  $E_i$ ,  $M_{ji}(E_i)$ , at a given sample  $i$ , is  
175 decomposed into the independent expression component,  $g_j(\cdot)$ , specified by unknown parameters  
176  $\Theta_j$ , and the dependent expression component,  $g_{j|j'}(\cdot)$ , specified by unknown parameters  $\Theta_{j|j'}$ . The  
177 independent component of gene  $j$  occurs if this gene is assumed to be expressed in an isolated  
178 environment, and it is determined by this gene's intrinsic property. The dependent component of  
179 gene  $j$  is the aggregated effect of all possible other genes  $j'$  ( $j' = 1, \dots, m; j' \neq j$ ) on this gene.  
180 General speaking, the independent expression of a gene is determined by its **endogenous**  
181 encoding capacity, whereas its dependent expression is under the **exogenous** control. The

182 structure of ODEs in Eq 1 is similar to the generalized Lotka-Volterra equations<sup>46</sup> with the  
183 community matrix replaced by the functions  $g_{j|j'}(\cdot)$  and the time derivative replaced by the EI  
184 derivative. Since they are not time based, such ODEs are called quasi-dynamic ODEs (qdODEs).  
185 It is straightforward to derive example equations of this type from the multi-gene replicator  
186 dynamics. Identifying these functions is a primary focus of research with a secondary effort  
187 being in interpretation and analysis of the resulting dynamical system.

188

### 189 **Inferring gene networks**

190 In practice, the number of genes for network reconstruction is commonly very large (e.g.,  $10^3$ –  
191  $10^4$ ), thus if the expression of each gene involves the effects of all other genes, ODEs in Eq 1  
192 will quickly become intractable. Indeed, it is unlikely that each gene performs an interaction with  
193 every other gene in the network. By regressing the expression of each gene  $j$  on the expression of  
194 all other genes  $j'$  ( $j' = 1, \dots, m; j' \neq j$ ), we formulate a multiple regression model across samples  
195 for variable selection. We implement adaptive LASSO to detect a small set of the most  
196 significant genes that affect a focal gene  $j$  (incoming links), but posing no constraint on the  
197 number of genes affected by the focal gene (outgoing links). This procedure enables the  
198 reconstruction of a high-dimensional but sparse and stable GRN under the convex optimization  
199 formulation (see Online Methods). These GRNs are regarded as **idopGRNs** (Fig. 1B) because of  
200 their following five major features:

201

202 **(i) Bidirectional, signed, and weighted:** Let  $G_j(\cdot)$  and  $G_{j|j'}(\cdot)$  denote integrals of  $g_j(\cdot)$  and  
203  $g_{j|j'}(\cdot)$  that constitute the system of qdODEs in Eq 1, respectively. Note that, for a focal gene  $j$ ,  
204 the number of its incoming links is  $d_j$  ( $\ll m$ ) after variable selection. The estimate of  $G_{j|j'}(\cdot)$  can  
205 help judge in which way gene  $j'$  affects gene  $j$ . If it is positive, negative, or zero, then this  
206 suggests that gene  $j'$  promotes, inhibits, or is neutral to, gene  $j$ , respectively. The value of the  
207 estimate can quantify the strength of promotion or inhibition. By comparing  $G_{j|j'}(\cdot)$  and  $G_{j'|j}(\cdot)$ ,  
208 we can determine whether these two genes reciprocally trigger impacts on each other. Further,  
209 we reconstruct a **bidirectional, signed, and weighted** graph as the gene network of the sample  
210 by considering all possible gene pairs detected from variable selection. The estimate of  $G_j(\cdot)$   
211 represents how much amount of expression a given gene  $j$  may intrinsically release, and its value

212 is proportional to the size of a node in the graph.

213

214 **(ii) Dynamic:** The amount of dependent expression  $G_{j|j'}(\cdot)$  is a function of  $E_i$ , suggesting that  
215 the dependent amount of gene  $j$  affected by gene  $j'$  can be estimated at any given EI. Thus, we  
216 can reconstruct a series of “dynamic” networks across samples. These networks allow geneticists  
217 to test how GRNs alter structurally and functionally in response to environmental and  
218 developmental cues. These tests can be made locally, i.e., testing how networks differ between  
219 two time points of interest under the same treatment or between different treatments at the same  
220 time point.

221

222 **(iii) Omnidirectional but sparse:** If the number of genes for network reconstruction is large, we  
223 should build a high-dimensional set of ODEs that can specify the whole picture of gene  
224 interactions in the network. The implementation of variable selection can detect the most  
225 significant links to construct a sparse network but still allows all possible realistically existing  
226 links to be encapsulated as a whole that underlie the behavior of gene networks. This dimension  
227 reduction procedure will become even more valuable since more and more studies attempt to  
228 reconstruct regulatory networks from genomic, proteomic, and metabolomics data. A more fine-  
229 grained network inferred from these omics data at different levels or through different pathways  
230 can reveal previously hidden contributions of gene interactions to cellular processes.

231

232 **(iv) Personalized:** The most noticeable advantage of our approach is the ability to pack steady-  
233 state expression data into highly informative networks that can currently be inferred only from  
234 high-density temporal data. As a function of  $E_i$ , the independent and dependent expression values  
235 of genes can be calculated for any sample from  $G_j(\cdot)$  and  $G_{j|j'}(\cdot)$ , respectively. These values  
236 enable the inference of sample-specific networks from which to compare how networks differ  
237 among entities (e.g., subjects, tissue types, or cell types), treatment levels, and times (Fig. 1B).

238

239 The main merit of a mathematical model is its ability to make a prediction for the future. The  
240 qdODEs allow the independent and dependent expression levels of genes to be calculated as long  
241 as EI is provided. Thus, for those samples that are not included in our network reconstruction, we  
242 can interpolate or extrapolate gene networks based on their EIs. Individualized networks are



243 likely to be associated with clinical and disease phenotypes and, therefore, can be potentially  
244 useful for predicting health risk.

245

246 (*v*) **Biologically meaningful and socially interpretable**: Because of bidirectional and signed  
247 features, the network can discern distinct patterns of gene interactions (Fig. 1B). If two genes  
248 facilitate each other by producing factors that promote both parties, then **synergism** occurs. In  
249 contrast, an **antagonism** occurs if two genes inhibit each other. **Commensalism** results if one  
250 gene promotes its partner but the latter does not affect the former (neutral), while **amensalism**  
251 occurs if one gene inhibits the other and the other is neutral. If one gene inhibits the other but the  
252 latter promotes the former, then the former exerts **parasitism** to the latter. Conversely, one gene  
253 promotes the other but the latter inhibits the former, then the former offers **altruism** to the latter.  
254 A lack of any interaction, then, is when two genes coexist and are neutral to each other. These  
255 interaction patterns contain the underlying mass, energetic, or signal basis of gene interactions  
256 and, therefore, they are more biologically meaningful than the traditional descriptions of genetic  
257 epistasis based on statistical tests. A gene may actively manipulate other genes (by promoting or  
258 inhibiting the latter) but, meanwhile, may also be passively manipulated by other genes. In  
259 networks reconstructed from our approach, one can identify the numbers of such active links and  
260 passive links for each gene. If a gene has more active links than passive links, it is regarded as a  
261 social gene. If a gene's active links are more than the average of all genes (i.e., connectivity),  
262 then this gene is a core gene that is believed to play a pivotal role in maintaining gene networks.  
263 If a gene has less links, including active and passive, than the average, it is a solitary gene.

264

## 265 **Results**

### 266 **Human vein bypass grafting**

267 Rehfuss et al.<sup>27</sup> reported a genomic study of infrainguinal vein bypass grafting involving 48  
268 patients, among whom 35 succeeded and 13 failed. To investigate the genomic mechanism  
269 underlying graft outcome, transcriptomes of circulating monocytes from patients of success and  
270 failure were monitored at pre-operation and at days 1, 7, and 28 post-operation. We selected a  
271 subset of genes measured (1,870) that change significantly as a function of time per ANOVA ( $P$   
272  $< 0.05$ ) for idopGRN reconstruction. Four time points of gene monitoring for 48 patients form  
273  $4 \times 48 = 192$  samples.

274 By plotting the expression of individual genes against EI across these samples, we found that  
275 each gene's EI-varying expression is broadly in agreement with the part-whole relationship  
276 theory. In Fig. 2, we chose four representative genes for their fitness to the power equation (13).  
277 The expression of ADAM9 and LCN2 increases with EI, but the former displays a greater slope  
278 of increase (Fig. 2A) than does the latter (Fig. 2B). In contrast, the expression of PLXNA4 (Fig.  
279 2C) and NSUN7 (Fig. 2D) decreases with EI, but with different slopes. We used Kim et al.'s  
280 functional clustering<sup>47</sup> to categorize all genes considered into 145 modules each with a distinct  
281 EI-varying pattern.

282  
283 We randomly choose one successful patient (#125) and one failed patient (#205) and compare  
284 how they respond to grafting through network alterations. GRNs that specify the alterations of  
285 gene co-expression across environmental change are called environment-perturbed GRNs. Figure  
286 3 illustrates graft-perturbed idopGRNs at the module level from pre-operation to days 1 (A), 7  
287 (B), and 28 (C) post-operation, respectively, for #205 (upper panel) and #125 (lower panel). The  
288 two patients display some commonalities and differences in terms of their network structure and  
289 sparsity. For example, module 53 is a hub that actively regulate many other modules in both  
290 success and failure graft-perturbed GRNs. This module only contains an antisense lncRNA gene,  
291 C5orf26/EPB41L4A-AS1, located in the 5q22.2 region of the genome [99]. This gene plays a  
292 role in the development, activation, and effector functions of immune cells [100]. However, the  
293 two networks are remarkably different in many aspects. First, the success network contains more  
294 links than the failure network at the early and middle stage of recovery after grafting, but this  
295 difference disappears at the late stage of recovery, suggesting that the successful patient can  
296 more quickly establish a stable network than the failed patient. Second, the success network from  
297 pre-operation to day 1 post-operation is framed by multiple hubs (including not only 53 but also  
298 5, 86, and 109), each displaying strong links with many other modules, but the failure network is  
299 only dominated by hub 53 with relatively weak links to other modules. Third, graft-perturbed  
300 networks alter more dramatically in topological structure across time for the failed patient than  
301 the successful patient.

302  
303 We reconstructed outcome-perturbed networks between successful and failed outcomes at  
304 different stages of operation (Fig. 4). We argue that if networks are not associated with graft

305 outcomes, outcome-perturbed networks should be similar structurally preoperatively and post-  
306 operation. The outcome-perturbed network prior to operation is dominated primarily by hub  
307 module 53, followed by module 124 (Fig. 4A), but the outcome-perturbed network at day 1 post-  
308 operation involves hubs 53, 124, 109, 59, and 5 (Fig. 4B). Module 53 drives the prior network  
309 purely through inhibiting other modules, whereas much of its role in the post network is played  
310 by promotion. Outcome-perturbed networks at days 7(Fig. 4C) and 29 post-operation (Fig. 4D)  
311 differ not only from that prior to operation in terms of the number and type of hub modules, but  
312 also are sharply contrast to those at day 1 post-operation. Taken together, the genomic  
313 mechanisms driving outcome difference can be interrogated by the topology of graft- and  
314 outcome-perturbed idopGRNs reconstructed by our approaches.

315  
316 How much a gene is expressed across dynamic networks is determined by its endogenous  
317 encoding force and the exogenous influence by other genes. Our approach can dissect the overall  
318 expression level of each gene into its independent and dependent expression components. The  
319 sign and size of the dependent components can explain how each gene is regulated by other  
320 genes in the networks. Four representative modules 20, 27, 118, and 135 exhibit distinct  
321 expression patterns across samples, whose underpinnings can be illustrated by drawing the  
322 independent and dependent expression curves (Fig. 5). The independent expression of each  
323 module increases exponentially with EI, but the slopes of increase vary depending on module  
324 type. Modules 20 and 27 are each promoted by other modules, 109, 1, 59 and 115 for the former  
325 (Fig. 5A) and 5, 53, and 13 for the latter (Fig. 5B), both listed in the order of promotion degree.  
326 These modules produce accumulative positive dependent effects on the expression of modules 20  
327 and 27, leading the observed expression level of these two focal modules to be higher than their  
328 independent expression level across EI gradients. By contrast, the independent expression level  
329 of modules 118 and 135 is downshifted by a set of eight modules for the former (Fig. 5C) and a  
330 set of four modules for the latter (Fig. 5D). These two sets of modules inhibit the expression of  
331 modules 118 and 135, respectively, producing accumulative negative dependent effects on the  
332 focal modules.

333

### 334 **Rabbit vein bypass graft**

335 We analyzed a second data set of gene expression to validate the usefulness of our approach. The

336 data of microarray genes was collected from a rabbit bilateral vein graft construct<sup>28</sup>. New  
337 Zealand white rabbits (weighing 3.0–3.5 kg) of high genetic similarity were treated by bilateral  
338 jugular vein interposition grafting and unilateral distal carotid artery branch ligation to create two  
339 6-fold different blood flows. Thousands of genes were monitored on vein grafts, harvested at 2  
340 hours, 1, 3, 7, 14, 30, 90 and 180 days after implantation, under both conditions, high flow and  
341 low flow. Each outcome involves three to six rabbits at each time point, which totalize 73  
342 samples. We chose a set of differentially expressed genes (1,395) for idopGRN reconstruction.  
343 We calculated the EI of each sample with these genes and plotted the expression of individual  
344 genes against EI. EI-varying expression profiles, fitted by a power function (Fig. S1), were  
345 clustered into 50 modules (Fig. S1).

346  
347 We reconstructed module-based idopGRNs of gene co-expression altered from time 2 hours to 1  
348 (A), 30 (B), and 180 days (C) after implantation under high and low flows (Fig. S2). These  
349 networks change strikingly in the structure and connectivity across times under both flow  
350 conditions. Also, at the same time, idopGRNs differ between high and low flows. Flow-  
351 perturbed networks are structurally simple at time 2 hours, but show increasing complexities  
352 with time (Fig. S3), suggesting that high and low flows need a time to display their differences.  
353 Figure S4 illustrates how the expression of four modules is determined by their endogenous  
354 capacity and the exogenous influence of other modules. The overall expression of modules 3 (A),  
355 45 (B), and 38 (D) was observed to be higher than their independent expression because of  
356 positive influences exerted by other modules, but module 20 (C) is negatively affected by other  
357 modules, making its overall expression lower than independent expression. Taken together,  
358 results from the rabbit grafting study support the usefulness of our network inference approach.

359

### 360 **Computer simulation**

361 We will perform computer simulation studies to examine the stability, robustness, and sensitivity  
362 of our approach under different scenarios of different sample sizes and measurement errors. We  
363 simulated the expression data of  $m$  genes,  $\mathbf{y}_j = (y_j(E_1), \dots, y_j(E_N))$  ( $j = 1, \dots, n$ ), across  $N$   
364 samples, with  $y_j(E_i)$  varying with  $E_i$  ( $i = 1, \dots, N$ ). The EI-varying expression change of gene  $j$   
365 is specified by an arbitrary form of endogenous expression curve and the sum of arbitrary forms  
366 of exogenous curves determined by a set of other genes, plus the residual error of gene  $j$  in

367 sample  $i$ , following a multivariate normal distribution with the mean vector  $\mathbf{0}$  and covariance  
368 matrix  $\Sigma$  whose structure following the AR(1) model. We design different scenarios by changing  
369 the number of samples, variance and covariance.

370  
371 Suppose the expression data of 50 genes across 50, 100, and 200 samples are simulated,  
372 respectively. Each gene interacts with a specific set of genes across samples, which are specified  
373 by a system of EI-varying qdODEs in Eq. 4. The residual variances and correlation coefficient of  
374 gene expression are set as  $\sigma_j^2 = 0.01$  or  $0.1$  and  $\rho = 0$  or  $0.3$ , respectively. The statistical efficacy  
375 of the new approach in terms of gene-gene interaction detection was evaluated by several  
376 conventional criteria, including true positive (TP), false positive (FP), true negative (TN), and  
377 false negative (FN), from which true positive rates (TPR) and false positive rates (FPR) are  
378 calculated by  $TPR = TP/(TP+FN)$  and  $FPR = FP/(FP+TN)$ . In addition, the area under the curve  
379 (AUC) of the receiver operating characteristic curve (ROC) was calculated from the coordinates  
380 of TPR and FPR. Table S1 gives the results from our simulation studies under different  
381 parameter combinations. FPR is very low in every case, suggesting that the approach can be  
382 safely used in practice. In general, TPR is reasonably good, but depending on sample size and  
383 measurement error. If a small sample size (say 50) is used, we need to improve gene  
384 measurement precision to obtain good interaction detection power (say 0.75). If the measurement  
385 precision cannot be assured, sample size should be large enough. AUC performs quite well  
386 although it also depends on sample size and measurement error.

387

## 388 **Discussion**

389 The past two decades have witnessed countless transcriptional experiments initiated to explore  
390 the genomic mechanisms underlying high-order phenotypes for a wide range of organisms.  
391 These experiments were designed to monitor gene expression profiles of biological entities under  
392 contrast conditions and/or across developmental times. By various comparative analysis and  
393 tests, genes expressed differentially under different conditions or over times are identified as  
394 biomarkers of phenotypic variation. Cluster analysis was also used to detect distinct patterns of  
395 gene expression, facilitating the interpretation of the genomic control over phenotypic or  
396 developmental plasticity<sup>28</sup>. However, these widely used standard genomic experiments have not  
397 purported to reconstruct gene regulatory networks (GRNs), although these networks play a major

398 role in linking genotype to phenotype<sup>1,2</sup>. The inference of informative GRNs critically relies  
399 upon more expensive experiments that are specially designed to produce either perturbed  
400 expression data or high-density temporal expression data (Huynh-Thu and Sanguinetti 2018).

401  
402 In this article, we represent an interdisciplinary approach for reconstructing biologically  
403 meaningful GRNs from standard gene expression experiments. How much a gene is expressed in  
404 a biological entity is determined by multiple endogenous and exogenous factors. These factors  
405 together form the “ecological” component of the entity related to the gene’s overall expression  
406 within a network, which can be virtualized as the niche of the gene according to ecology  
407 theory<sup>30</sup>. While niche differences maintain the stability of gene networks, the sum of gene-  
408 specific niches on an entity reflects the entity’s capacity to supply energy and material for all  
409 genes to be expressed. We define the total expression amount of all genes on an entity as the  
410 niche index (NI) of the entity. We integrate and contextualize the niche theory of biodiversity  
411 (describing how genes are expressed differently across entities) and evolutionary game theory  
412 (describing how genes are co-expressed differently across entities) to derive a system of quasi-  
413 dynamic ordinary differential equations (qdODEs) with the NI derivative. Such qdODEs specify  
414 gene interdependence and interconnection, constructed from any transcriptional experiments  
415 involving multiple entities under different treatments, monitored at several key stages and/or  
416 across spaces. The optimization solution of these ODEs, through the implementation of variable  
417 selection, enables the inference and recovery of informative (encapsulating bidirectional, signed,  
418 and weighed links), dynamic (tracing network alterations across spatiotemporal gradients),  
419 omnidirectional (capturing all possible links but maintaining the sparsity of networks), and  
420 personalized (individualizing networks for each entity) GRNs (idopGRNs).

421  
422 We incorporate community ecology theory to interpret the biological relevance of idopGRNs.  
423 Like the pattern of species-species interaction as a function of resource availability<sup>48</sup>, how one  
424 gene interacts with others depends on signal transduction and information flow. The same gene  
425 may form a synergistic coexistence with the second gene through cooperation, but may establish  
426 an antagonistic relationship with the third gene through competition. The biological  
427 underpinnings causing each interaction can be speculated by ecological principles.

428

429 We validated the utility of our approach by analyzing gene expression data from surgical  
430 patients. Vein bypass grafting is an essential treatment for lower extremity arterial occlusive  
431 disease, but only with 30 – 50% success rate<sup>27</sup>. The biological mechanisms underlying the  
432 outcome of grafts include cue-induced differentiation of gene expression. We used our approach  
433 to reconstruct graft- and outcome-perturbed idopGRNs from 1,870 differentially expressed genes  
434 and identified identify key genes and key interactions that cause success vs. failure. As an  
435 antisense lncRNA gene, located in the 5q22.2 region of the genome, C5orf26/EPB41L4A-AS1  
436 plays a leadership role in regulating other genes within networks (99). How many genes it  
437 regulates, how differently it regulate these genes, and how its regulation responds to grafting and  
438 recovery are all potentially important for patients to cure. Based on previous functional studies  
439 (100), we postulate that the role of C5orf26/EPB41L4A-AS1 in mediating and activating the  
440 gene networks toward cure may be executed through its effects on the development, activation,  
441 and effector functions of immune cells. We found more links in the networks of successes than  
442 those of failures at the early and middle stage of recovery after grafting. Previous ecological  
443 studies show that the number of links, which is usually defined as the complexity of a network<sup>49</sup>,  
444 is positively correlated with the stability of the network<sup>50-52</sup>. This thus suggest that the successful  
445 patient can more quickly establish a stable network than the failed patient. In conjunction with  
446 results from the rabbit vein grafting study, it is suggested that idopGRNs determine grafting  
447 outcome by their key genes, structure, complexity, and organization.

448  
449 Given that complex phenotypes form, develop and alter through genetic networks, computational  
450 methods for detecting putative functional relationships between genes are clearly needed.

451 Although extensive efforts have been made to reconstruct various GRNs, most network inference  
452 methods cannot provide an omnidirectional and quantitative assessment of network structure and  
453 organization. Our approach presented in this article has well resolved these issues, additionally  
454 equipping the network reconstruction with biologically meaningful interpretations. Our  
455 idopGRNs potentially provide powerful tools to explore various omics data, generate  
456 mechanistic hypotheses, and guide further experiments, model development, and analyses. By  
457 validating or invalidating various hypotheses experimentally, new scientific discoveries can be  
458 made, new insights gained, and new network models revised. Our approach can be refined to  
459 accommodate the data features of single cell analysis<sup>53</sup>, which enables idopGRNs to explore an

460 in-depth mechanisms that drive remote biochemical, developmental, and physiological  
461 transitions from genotype to phenotype.

462

### 463 **Acknowledgements**

464 This study has been supported by Fundamental Research Funds for the Central Universities  
465 (NO. 2015ZCQ-SW-06) and grants U01 HL119178 and NICHD 5R01HD086911-02 from the  
466 National Institute of Health.

467

### 468 **Author contributions**

469 C.C. and L. J. designed and implemented the algorithm and performed data analysis and  
470 computer simulation. M.W., Y.W., B.C., Z.L. Z.W., and W.H. participated in model derivations,  
471 data analysis, and result interpretation. S.B. designed and performed the genomic experiments.  
472 R.W. conceived of the idea, supervised the study, and wrote the manuscript with inputs from  
473 C.C., L.J., and M.W.

474

### 475 **Competing interests**

476 The authors declare no competing interests

477

### 478 **References**

- 479 1. Gardner TS, di Bernardo D, Lorenz D, Collins JJ. Inferring genetic networks and  
480 identifying compound mode of action via expression profiling. *Science* 2003;301:102–105.
- 481 2. Costanzo M, VanderSluis B, Koch EN, Baryshnikova A, Pons C, Tan G, Wang W, Usaj  
482 M, Hanchard J, Lee SD et al. A global genetic interaction network maps a wiring diagram  
483 of cellular function. *Science* 2016;353:pii: aaf1420.
- 484 3. Karlebach G, Shamir R. Modelling and analysis of gene regulatory networks. *Nat Rev Mol*  
485 *Cell Biol* 2008;9:770-780.
- 486 4. Oates CJ, Amos R, Spencer SEF. Quantifying the multi-scale performance of network  
487 inference algorithms. *Stat Appl Genet Mol Biol* 2014;13:611–631.
- 488 5. Chan TE, Stumpf MPH, Babbie AC. Gene regulatory network inference from single-cell  
489 data using multivariate information measures. *Cell Syst* 2017;5(3):251-267.



- 490 6. Bornholdt S. Boolean network models of cellular regulation: prospects and limitations. *J*  
491 *Roy Soc Interf* 2008;5:S85–S94.
- 492 7. Werhli AV, Husmeier D. Reconstructing gene regulatory networks with Bayesian  
493 networks by combining expression data with multiple sources of prior knowledge. *Stat*  
494 *Appl Genet Mol Biol* 2007;6:1–47.
- 495 8. Stuart JM, Segal E, Koller D, Kim SK. A gene-coexpression network for global discovery  
496 of conserved genetic modules. *Science* 2003;302:249–255.
- 497 9. Wang J, Chen B, Wang Y, Wang N, Garbey M, Tran-Son-Tay R, Berceci SA, Wu RL.  
498 Reconstructing regulatory networks from the dynamic plasticity of gene expression by  
499 mutual information. *Nucleic Acids Res* 2013;41:e97.
- 500 10. Han SW, Chen G, Cheon M-S, Zhong H. Estimation of directed acyclic graphs through  
501 two-stage adaptive Lasso for gene network inference. *J Am Stat Assoc* 2016;111:1004-  
502 1019.
- 503 11. Proulx SR, Promislow DE, Phillips PC. Network thinking in ecology and evolution.  
504 *Trends Ecol Evol* 2005;20:345-353.
- 505 12. Ghahramani, Z. Learning Dynamic Bayesian Networks. *Lecture Notes in Computer*  
506 *Science* 1998;1387, 168–197.
- 507 13. Perrin BE, Ralaivola L, Mazurie A, Bottani S, Mallet J, d'Alché-Buc F. Gene networks  
508 inference using dynamic Bayesian networks. *Bioinformatics* 2003;Suppl 2:ii138-48.
- 509 14. Zou M, Conzen SD. A new dynamic Bayesian network (DBN) approach for identifying  
510 gene regulatory networks from time course microarray data. *Bioinformatics* 2005;21:71-  
511 79.
- 512 15. Lu T, Liang H, Li H, Wu H. High-dimensional ODEs coupled with mixed-effects  
513 modeling techniques for dynamic gene regulatory network identification. *J Am Stat Assoc*  
514 2011;106:1242-1258.
- 515 16. Wu H, Lu T, Xue H, Liang H. Sparse additive ordinary differential equations for dynamic  
516 gene regulatory network modeling. *J Am Stat Assoc* 2014;109:700-716.
- 517 17. Henderson J, Michailidis G. Network reconstruction using nonparametric additive ODE  
518 models. *PLoS ONE* 2014;9(4):e94003.
- 519 18. Chen S, Shojaie A, Witten D. Network reconstruction from high-dimensional ordinary  
520 differential equations. *J Am Stat Assoc* 2017;112:1697-1707.

- 521 19. Swain PS, Elowitz MB, Siggia ED. Intrinsic and extrinsic contributions to stochasticity in  
522 gene expression. *Proc Natl Acad Sci U S A* 2002;99(20):12795-12800.
- 523 20. Raj A, van Oudenaarden A. Nature, nurture, or chance: stochastic gene expression and its  
524 consequences. *Cell* 2008;135(2):216-226.
- 525 21. Grundberg E, Small KS, Hedman ÅK, Nica AC, Buil A, Keildson S, Bell JT, Yang TP,  
526 Meduri E, et al. Mapping cis- and trans-regulatory effects across multiple tissues in twins.  
527 *Nat Genet* 2012;44:1084-1089.
- 528 22. Angulo MT, Moreno JA, Lippner G, Barabási AL, Liu YY. Fundamental limitations of  
529 network reconstruction from temporal data. *J R Soc Interf* 2017;14(127).
- 530 23. Huynh-Thu V, Sanguinetti G. Gene regulatory network inference: an introductory survey  
531 arXiv preprint (2018).
- 532 24. Levine JM, HilleRisLambers J. The importance of niches for the maintenance of species  
533 diversity. *Nature* 2009;461:254–257.
- 534 25. Tan JQ, Kelly CK, Jiang L. Temporal niche promotes biodiversity during adaptive  
535 radiation. *Nat Commun* 2013;4:2102.
- 536 26. Zuppinge-Dingley D, Schmid B, Petermann J, Yadav V, De Deyn GB, Flynn D, Dan FB.  
537 Selection for niche differentiation in plant communities increases biodiversity  
538 effects. *Nature* 2014; 515:108-111.
- 539 27. Rehfuß JP, DeSart KM, Rozowsky JM, O'Malley KA, Moldawer LL, Baker HV, Wang  
540 YQ, Wu RL, Nelson PR, Berceli SA. Hyperacute monocyte gene response patterns are  
541 associated with lower extremity vein bypass graft failure. *Circ Genom Precis Med*  
542 2018;11(3): e001970.
- 543 28. Wang YQ, Xu M, Wang Z, Tao M, Wang L, Zhu J, Li RZ, Berceli SA, Wu RL. How to  
544 cluster gene expression dynamics in response to environmental signals. *Brief Bioinform*  
545 2012;13:162–174.
- 546 29. Elton CS. *Animal Ecology*. London: Sidwich & Jackson (1927).
- 547 30. Pocheville A. The Ecological Niche: History and Recent Controversies. In Heams,  
548 Thomas; Huneman, Philippe; Lecointre, Guillaume; et al. *Handbook of Evolutionary*  
549 *Thinking in the Sciences*. Dordrecht: Springer. pp. 547-586 (2015).
- 550 31. Hui C. Carrying capacity, population equilibrium, and environment's maximal load. *Ecol*  
551 *Model* 2006;192:317–320.

- 552 32. Finlay KW, Wilkinson GN. The analysis of adaptation in a plant breeding program. *Aust J*  
553 *Agr Res* 1963;14:742-754.
- 554 33. Lobell DB, Roberts MJ, Schlenker W, Braum N, Little BB, Rejesus RM, Hammer GL.  
555 Greater sensitivity to drought accompanies maize yield increase in the U.S. Midwest.  
556 *Science* 2014;344:516-519.
- 557 34. Pereira FC, Berry D. Microbial nutrient niches in the gut. *Environ Microbiol* 2017;19(4):  
558 1366-1378.
- 559 35. Peterson AT, Soberón J, Pearson RG, Anderson RP, Martínez-Meyer E, Nakamura M,  
560 Araújo MP. Species-environment relationships. In: *Ecological Niches and Geographic*  
561 *Distributions (MPB-49)*. Princeton University Press. p. 82 (2011).
- 562 36. McConnaughey KDM, Coleman JS. Biomass allocation in plants: Ontogeny or optimality?  
563 A test along three resource gradients. *Ecology* 1999;80:2581-2593.
- 564 37. Xu S, Li Y, Wang G. Scaling relationships between leaf mass and total plant mass across  
565 Chinese forests. *PLoS ONE* 2014;9(4):e95938.
- 566 38. Gayon J. History of the concept of allometry. *Amer Zool* 2000;40:748-758.
- 567 39. Shingleton A. Allometry: The study of biological scaling. *Nat Ed Knowl* 2000;3(10):2.
- 568 40. McFarland DJ. Decision-making in animals. *Nature* 1977;269:15-21.
- 569 41. Dias-Ferreira E, Sousa JC, Melo I, Morgado P, Mesquita AR, Cerqueira JJ, Costa  
570 RM, Sousa N. Chronic stress causes frontostriatal reorganization and affects decision-  
571 making. *Science* 2009;325:621-625.
- 572 42. Park H, Lee D, Chey J. Stress enhances model-free reinforcement learning only after  
573 negative outcome. *PLoS ONE* 2017;12(7):e0180588.
- 574 43. Friedman A, Homma D, Bloem B, Gibb LG, Amemori KI, Hu D, Delcasso S, Truong  
575 TF, Yang J, Hood AS et al. Chronic stress alters striosome-circuit dynamics, leading to  
576 aberrant decision-making. *Cell* 2017;171:1191-1205.
- 577 44. von Neumann J, and Morgenstern S. *Theory of Games and Economic Behavior*. Princeton  
578 University Press, Princeton (1944).
- 579 45. Smith JM, Price GR. The logic of animal conflict. *Nature* 1973;246:15-18.
- 580 46. Hofbauer J, Sigmund K. *Evolutionary Games and Population Dynamics*. Cambridge  
581 University Press, Cambridge, UK (1998).

- 582 47. Kim B-R, Zhang L, Berg A, Fan J, Wu RL. A computational approach to the functional  
583 clustering of periodic gene expression profiles. *Genetics* 2008;180:821–834.
- 584 48. Vellend M. 2010. Conceptual synthesis in community ecology. *Q Rev Biol* 85: 183-206.
- 585 49. MacArthur R. Fluctuations of animal populations and a measure of community stability.  
586 *Ecology* 1955;36:533-536.
- 587 50. Arnold JS. Constraints on phenotypic evolution. *Am Nat* 1992;140:S85-S107.
- 588 51. Debat V, David P. Mapping phenotypes: canalization, plasticity and developmental  
589 stability. *Trends Ecol Evol* 2001;16:555-561.
- 590 52. Wagner A. *Robustness and Evolvability in Living Systems*. Princeton University Press  
591 (2005).
- 592 53. Luijk R, Dekkers KF, van Iterson M, Arindrarto W, Claringbould A, Hop P et al. Genome-  
593 wide identification of directed gene networks using large-scale population genomics  
594 data. *Nat Commun* 1018;9(1):3097.
- 595
- 596

## 597 **Online Methods**

598 Here, we describe a statistical procedure for solving a system of qdODEs in Eq 1. By obtaining  
 599 the maximum likelihood estimates of independent and dependent expression amounts of each  
 600 gene, idopGRNs can be reconstructed.

601

### 602 **Variable selection for interacting genes**

603 Let  $\mathbf{y}_j = (y_j(E_1), \dots, y_j(E_N))$  denote a vector of observed expression values for gene  $j$  ( $j = 1, \dots, m$ )  
 604 over all samples. The observed expression of gene  $j$  at sample  $i$  is expressed as

$$605 \quad y_j(E_i) = M_j(E_i) + e_j(E_i)$$

$$= G_j(M_{ji}(E_i); \Theta_j) + \sum_{j'=1, j' \neq j}^m G_{j|j'}(M_{j'i}(E_i); \Theta_{j|j'}) + e_j(E_i) \quad (2A)$$

$$606 \quad = \mu_j(E_i) + X_j^T \mathbf{b}_j(E_i) + e_j(E_i), \quad (2B)$$

607 where the overall expression level of focal gene  $j$ ,  $M_j(E_i)$ , includes its independent expression  
 608 component,  $\mu_j(E_i) = G_j(\cdot)$  and dependent expression component accumulatively determined by all  
 609 other genes,  $X_j^T \mathbf{b}_j(E_i) = \sum_{j'=1, j' \neq j}^m G_{j|j'}(\cdot)$ ; the derivatives of  $G_j(\cdot)$  and  $G_{j|j'}(\cdot)$  are  $g_j(\cdot)$  and  $g_{j|j'}(\cdot)$   
 610 of ODEs in Eq 1, respectively; and  $e_j(E_i)$  is the measurement error at sample  $i$ , assumed to be iid  
 611 with mean zero and variance  $\sigma_i^2$ . Note that  $X_j^T$  is the vector containing  $m - 1$  unities and  $\mathbf{b}_j(E_i) =$   
 612  $(b_{j|1}(E_i), \dots, b_{j|m}(E_i))$  is a vector of the dependent expression of gene  $j$  determined by all genes,  
 613 except for gene  $j$ .

614

615 Many nonparametric functions, such as B-spline, regression B-spline, penalized B-spline, local  
 616 polynomials, or Legendre orthogonal polynomials (LOP), can be used to model independent  
 617 expression curves,  $\mu_j(E_i)$ , and dependent expression curves,  $\mathbf{b}_j(E_i)$ . Chen et al.<sup>12</sup> have proved  
 618 statistical properties of B-spline variable selection for solving ODEs. Here, we implement B-  
 619 spline to fit  $\mu_j(E_i)$  and  $\mathbf{b}_j(E_i)$  in Eq 2B, allowing orders of nonparametric functions to be gene-  
 620 dependent and also differ between independent and dependent expression curves. For any gene  $j$   
 621 as a response, there are  $(m - 1)$  predictors, each of which contributes to the dependent expression  
 622 of this focal gene through unknown nonparametric dependent parameters  $\boldsymbol{\beta}_j = (\boldsymbol{\beta}_{j|1}, \dots, \boldsymbol{\beta}_{j|(j-1)},$   
 623  $\boldsymbol{\beta}_{j|(j+1)}, \dots, \boldsymbol{\beta}_{j|m})$ . Thus, we have  $m - 1$  groups of dependent parameters that reflects the regulation  
 624 of other genes for the focal gene. We implemented group LASSO<sup>54</sup> to select those nonzero

625 groups. The group LASSO estimators of dependent parameters, denoted as  $\hat{\boldsymbol{\beta}}_j = (\boldsymbol{\beta}_{j|1}, \dots, \boldsymbol{\beta}_{j|(j-1)},$   
 626  $\boldsymbol{\beta}_{j|(j+1)}, \dots, \hat{\boldsymbol{\beta}}_{j|d_j})$ , where  $d_j (\ll m)$  is the number of the most significant genes that interact with  
 627 gene  $j$ , can be obtained by minimizing the following penalized weighted least-square criterion,

$$628 \quad L_1(\hat{\boldsymbol{\beta}}_j, \lambda_j) = (\mathbf{Y}_j - \boldsymbol{\mu}_j - X_j^T \mathbf{b}_j)^T \mathbf{Z}_j (\mathbf{Y}_j - \boldsymbol{\mu}_j - X_j^T \mathbf{b}_j) + \lambda_{1j} \sum_{j'=1, j' \neq j}^m \|\boldsymbol{\beta}_{j|j'}\|_2, \quad (3)$$

629 where  $\mathbf{y}_j = (y_j(E_1), \dots, y_j(E_N))$ ,  $\mathbf{y}_j = (y_j(E_1), \dots, y_j(E_N))$ ,  $\boldsymbol{\mu}_j = (\mu_j(E_1), \dots, \mu_j(E_N))$ , and  $\mathbf{b}_j = (\mathbf{b}_j(E_1),$   
 630  $\dots, \mathbf{b}_j(E_N))$ ;  $\lambda_{1j}$  is a penalty parameter determined by BIC or extended BIC; and  $\mathbf{Z}_j = \text{diag}\{z_j(E_1),$   
 631  $\dots, z_j(E_N)\}$  where  $z_j(E_i)$  is a prescribed nonnegative weight function on  $[E_1, E_N]$  with boundary  
 632 conditions  $z_j(E_1) = z_j(E_N) = 0$ . This weight function is used to speed up the rate of convergence.

633

### 634 **Optimizing the topological structure of gene co-expression networks**

635 Through variable selection, we detect the most significant incoming links ( $d_j \ll m$ ) for each gene  
 636  $j$  that constitutes the qdODEs of Eq 1. By replacing  $m$  by  $d_j$ , these ODEs are modified as

$$\frac{dM_{ji}}{dE_i} = g_j(M_{ji}(E_i); \Theta_j) + \sum_{j'=1, j' \neq j}^{d_j} g_{j|j'}(M_{j'i}(E_i); \Theta_{j|j'}), j = 1, \dots, m; i = 1, \dots, N, \quad (4)$$

637 which are a sparse version that represents the full model of incoming links for each gene, but  
 638 with no constraint on the number of outgoing links and, therefore, the dimension of the network.

639 We formulate a likelihood approach to estimate the modified ODEs. Let  $\boldsymbol{\phi} = (\boldsymbol{\mu}; \boldsymbol{\Sigma}) \in \boldsymbol{\Phi}$  denote  
 640 all model parameters. The likelihood function of  $\boldsymbol{\phi}$  given these data is written as

$$641 \quad \mathcal{L}(\boldsymbol{\mu}; \boldsymbol{\Sigma}) = f(\mathbf{y}_1, \dots, \mathbf{y}_m | \boldsymbol{\mu}_1, \dots, \boldsymbol{\mu}_m; \boldsymbol{\Sigma}), \quad (5)$$

642 where  $f(\cdot)$  is the  $N$ -dimensional  $m$ -variate normal distribution for  $m$  gene across  $N$  samples with  
 643 mean vector  $\boldsymbol{\mu}$ ,

$$\boldsymbol{\mu} = (\boldsymbol{\mu}_1; \dots; \boldsymbol{\mu}_m) = (\mu_1(E_1), \dots, \mu_1(E_N); \dots; \mu_m(E_1), \dots, \mu_m(E_N)), \quad (6)$$

644

645 and covariance matrix  $\boldsymbol{\Sigma}$ ,

$$646 \quad \boldsymbol{\Sigma} = \begin{pmatrix} \boldsymbol{\Sigma}_1 & \cdots & \boldsymbol{\Sigma}_{1m} \\ \vdots & \ddots & \vdots \\ \boldsymbol{\Sigma}_{m1} & \cdots & \boldsymbol{\Sigma}_m \end{pmatrix}. \quad (7)$$

647

648 In Eq 6,  $\mu_j(E_i)$ , the mean value of the expression of gene  $j$  at sample  $i$ , whose derivative contains  
 649  $g_j(\cdot)$  and  $g_{j|j'}(\cdot)$  specified by the modified qdODEs in Eq 4, is modeled by B-spline function and

650 estimated by standard fourth-order Runge-Kutta algorithms. Since B-spline nonparametric  
651 functions are integrable, we can calculate  $G_j(\cdot)$  and  $G_{jj'}(\cdot)$ . In Eq 7,  $\Sigma_j$  is the sample-dependent  
652 covariance matrix of gene  $j$ , and  $\Sigma_{jj'}$  is the sample-dependent covariance matrix between genes  $j$   
653 and  $j'$ . We assume that the residual errors of gene expression are independent among samples  
654 and that the residual variance of each gene is constant across samples. Thus,  $\Sigma_j$  and  $\Sigma_{jj'}$  are  
655 structured as  $\Sigma_j = \sigma_j^2 \mathbf{I}_n$  and  $\Sigma_{jj'} = \sigma_{jj'} \mathbf{I}_n$ , respectively, where  $\sigma_j^2$  is the residual variance of gene  $j$   
656 at the same sample,  $\sigma_{jj'}$  is the residual covariance of genes  $j$  and  $j'$  at the same sample, and  $\mathbf{I}_n$  is  
657 the identity matrix. However, we implement the first-order autoregressive (AR(1)) model to fit  
658 the residual covariances of gene expression among different time points at the same individual<sup>55</sup>.

659

660 All model parameters  $\Phi$  can obtain their optimal solution by maximizing the likelihood in Eq 5,  
661 expressed as

$$\hat{\Phi} \in \left\{ \arg \max_{\Phi \in \Phi} \mathcal{L}(\mu, \Sigma) \right\}. \quad (8)$$

662 Intuitively, this maximum likelihood optimization implies an optimal topological structure and  
663 organization in which genes interact with each other to maximize the expression level of all  
664 genes as a whole. This solution of Eq 8 establishes the mathematical formulation of Smith and  
665 Price's evolutionary game theory<sup>45</sup>.

666

### 667 **Significance test of gene interactions**

668 One important issue for network reconstruction is how to statistically test the significance of  
669 edges as the measure of associations between nodes. We propose a likelihood ratio approach for  
670 network test. Under the null hypothesis that all microbes are independent from each other, the  
671 rate of expression change for each gene can be formulated by a reduced system of ODEs,  
672 expressed as

$$\frac{dM_{ji}}{dE_i} = g_j(M_{ji}(E_i); \Theta_j), j = 1, \dots, m; i = 1, \dots, N \quad (9)$$

673 which is contrasted to the full system of ODEs in Eq 4 as the alternative hypothesis stating that at  
674 least one gene interaction in the network is significant. We calculate the likelihood values under  
675 the null and alternative hypotheses and their log-likelihood ratio (LR) as a test statistic. A  
676 network-wise critical threshold can be determined by permutation tests. This procedure includes

677 (i) shuffling sample-varying expression data among genes to make a new data, (ii) calculating  
678 the LR value based on this new data, (iii) repeating (i) and (ii) many times (say 1000), and (iv)  
679 detecting the 95% percentile of these 1000 LR values which is the cutoff for the significance test  
680 of networks.

681

### 682 **Environment-perturbed networks**

683 Genetic networks may be activated when the organism experiences environmental change.  
684 Suppose that gene co-expression changes from one sample (say  $i_1$ ) to next (say  $i_2$ ) due to  
685 differences in the internal environment of samples. The amount of this change can be estimated  
686 by integrating the dependent expression component of qdODEs in Eq 4 from  $E_{i_1}$  to  $E_{i_2}$ ,  
687 expressed as

$$\Delta_{j|j'_{12}} = \int_{E_{i_1}}^{E_{i_2}} g_{j|j'}(M_{j'i}(E_t); \Theta_{j|j'}) dE_t, \quad (9)$$

688 which quantifies the expression difference of gene  $j$  regulated by gene  $j'$  by assuming that  
689 sample transport virtually from  $i_1$  to  $i_2$ . GRNs reconstructed from  $\Delta_{j|j'_{12}}$  ( $j \neq j' = 1, \dots, m$ ) reflect  
690 the alterations of gene co-expression in response to environmental change, which are called  
691 environment-perturbed GRNs. Based on this definition, we can reconstruct treatment-, outcome-,  
692 development, or signal-perturbed networks to better understand the genomic mechanisms  
693 underlying cellular, physiological, and ecological processes.

694

### 695 **References**

696 54. Yuan M, Lin Y. Model selection and estimation in regression with grouped variables. *J Roy*  
697 *Stat Soc Ser B* 2006;68:49–67.

698

699 55. Zhao W, Hou W, Littell RC, Wu RL. Structured antedependence models for functional  
700 mapping of multivariate longitudinal quantitative traits. *Stat Appl Genet Mol Biol* 2005;4:Issue  
701 1.

702

703

704



## 705 **Figure Legends**

706

707 **Figure 1. (A)** Diagram of a standard genomic study including multiple entities under two levels  
708 of treatment, I and II. Transcriptomic profiles are monitored at key time points including one  
709 before treatment ( $t_0$ ) and several others at early ( $t_1$ ), middle ( $t_2$ ), and late stages ( $t_3$ ) of response  
710 after treatment. **(B)** Illustration of informative, dynamic, omnidirectional, and personalized gene  
711 regulatory networks (idopGRNs) among six hypothetical genes from the standard genomic study.  
712 idopGRNs vary structurally among samples. For example, genes 1 and 2 are slightly antagonistic  
713 in sample 1, moderately antagonistic in sample 2, mutualistic in sample N, and parasitic/altruistic  
714 in a predicted sample. The commensalism of gene 5 to gene 1 is strong in samples 1 and N, but  
715 weak in sample 2. Because outgoing links are more than incoming links, gene 5 is a social gene  
716 in all samples, but the degree of its sociality is different across samples.

717

718 **Figure 2.** The fitness of a power equation as a function of expression index (EI) (green line) to  
719 the observed expression levels of four genes, ADAM9 **(A)**, LCN2 **(B)**, PLXNA4 **(C)**, and  
720 NSUN7 **(D)**, chosen from the genomic study of human infrainguinal vein bypass grafting, across  
721 samples. Samples involve 48 patients, i.e., 35 successes (plus) and 13 failures (circle), multiplied  
722 by four time points (including day 0 pre-operation and days 1, 7, and 28 post-operation). Ticks  
723 on the x-axis represent the positions of each sample in terms of its EI.

724

725 **Figure 3.** Graft-perturbed networks that code how different gene modules are co-expressed for a  
726 failed patient (upper panel) and a successful patient (lower panel) in response to physiological  
727 changes from pre-operation to day 1 **(A)**, 7 **(B)**, and 28 **(C)** post-operation. Numbers in small  
728 circles (each denoted as a node of the graph) represent module IDs. Red and blue arrows denote  
729 the direction by a gene promotes and inhibits other genes, respectively, and the thickness of an  
730 arrowed line is proportional to the strength of promotion or inhibition. A proportion of modules  
731 are unlinked, suggesting that they are neutral to each other and other linked genes. Dark red  
732 circles denote hub modules with higher connectivity than the average number of links among all  
733 modules.

734

735 **Figure 4.** Outcome-perturbed networks that code how different gene modules are co-expressed  
736 in response to successful vs. failed patients prior to operation (**A**) and day 1 (**B**), 7 (**C**), and 28  
737 (**D**) post-operation. Numbers in small circles (each denoted as a node of the graph) represent  
738 module IDs. Red and blue arrows denote the direction by a gene promotes and inhibits other  
739 genes, respectively, and the thickness of an arrowed line is proportional to the strength of  
740 promotion or inhibition. A proportion of modules are unlinked, suggesting that they are neutral  
741 to each other and other linked genes. Dark red circles denote hub modules with higher  
742 connectivity than the average number of links among all modules.

743  
744 **Figure 5.** Overall fitted curves of gene expression (orange line) from modules 20 (**A**), 27 (**B**),  
745 118 (**C**), and 135 (**D**) by a system of qdODEs as a function of expression index (EI) in the human  
746 vein grafting study. Each dot denotes a sample representing a patient with outcome success  
747 (plus) or failure (circle), measured at a time point (day 0 pre-operation and days 1, 7, and 28  
748 post-operation). The overall expression curve of each module is decomposed into its endogenous  
749 expression curve (blue line) and exogenous expression curves (green lines) exerted by a set of  
750 other modules (listed by their IDs). Exogenous expression curves are better displayed by a small  
751 plot within each large plot. Value 0 at y-axis is a cut-off point that describes how a focal module  
752 is regulated by other modules: Greater than 0 for promotion, less than 0 for inhibition, and zero  
753 for neutrality. Ticks on the x-axis represent the positions of each sample in terms of its EI.

754

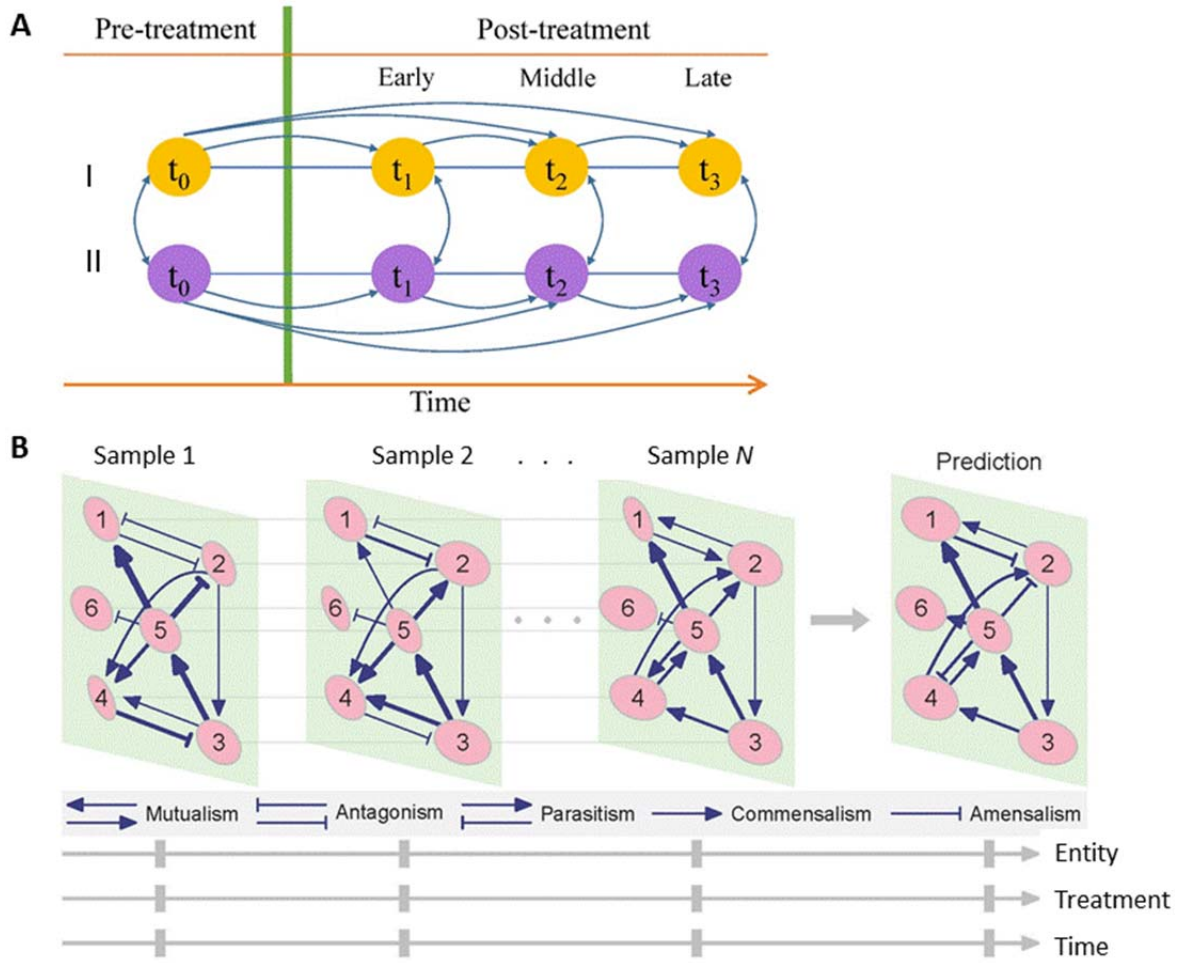

755  
756  
757  
758  
759  
760  
761

**Figure 1**

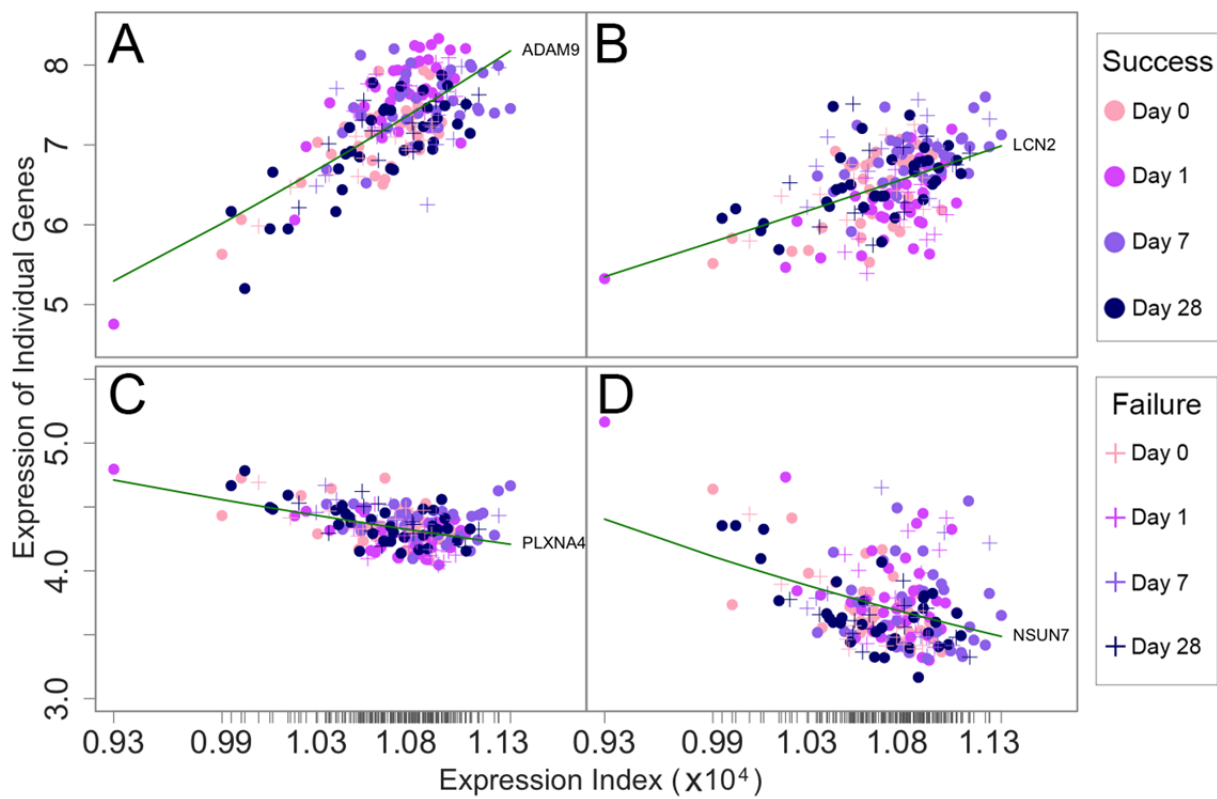

762  
763  
764  
765  
766  
767  
768  
769

**Figure 2**

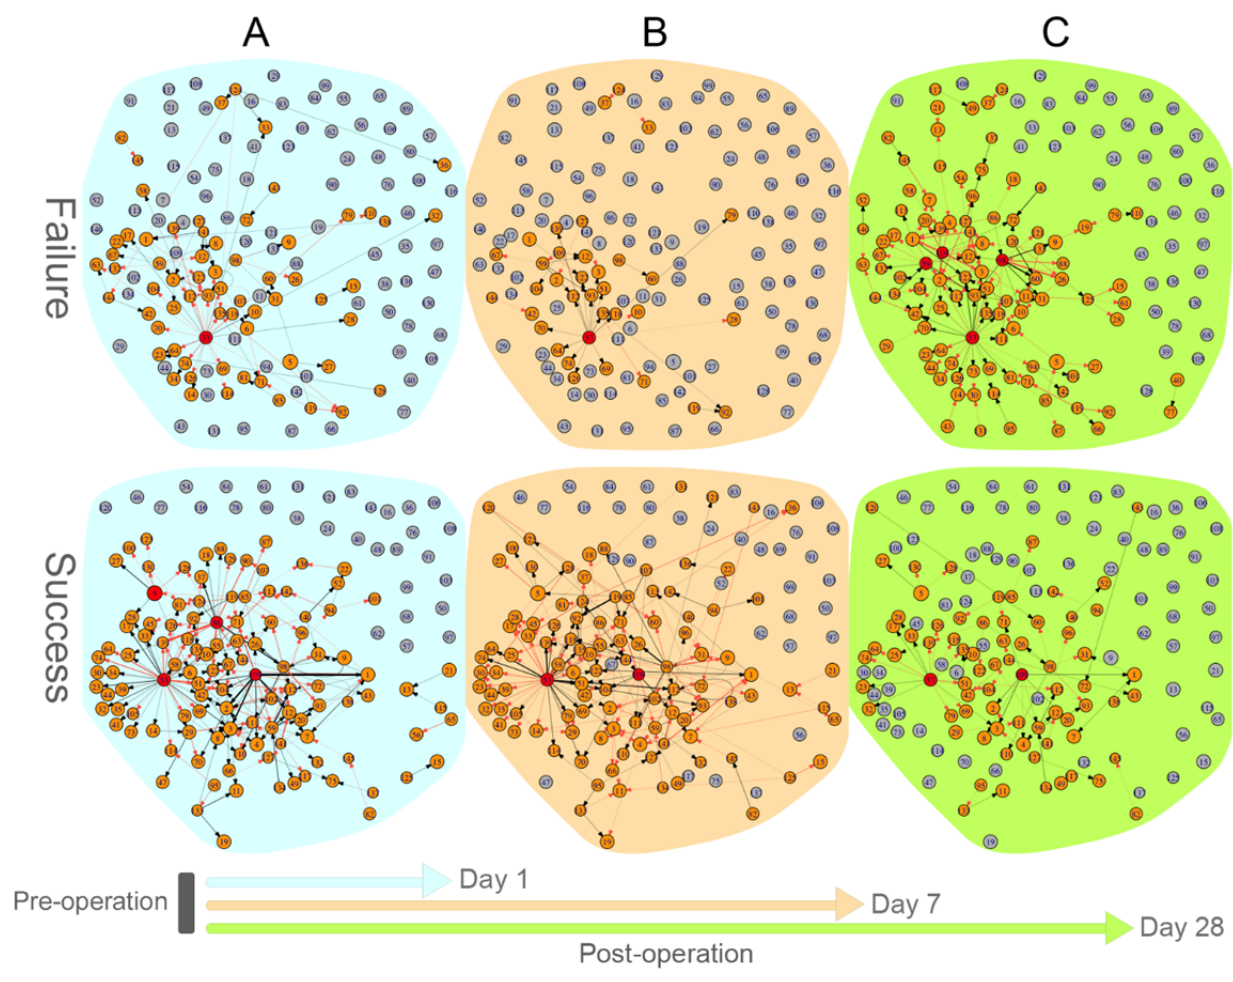

770  
771  
772  
773  
774  
775  
776

**Figure 3**

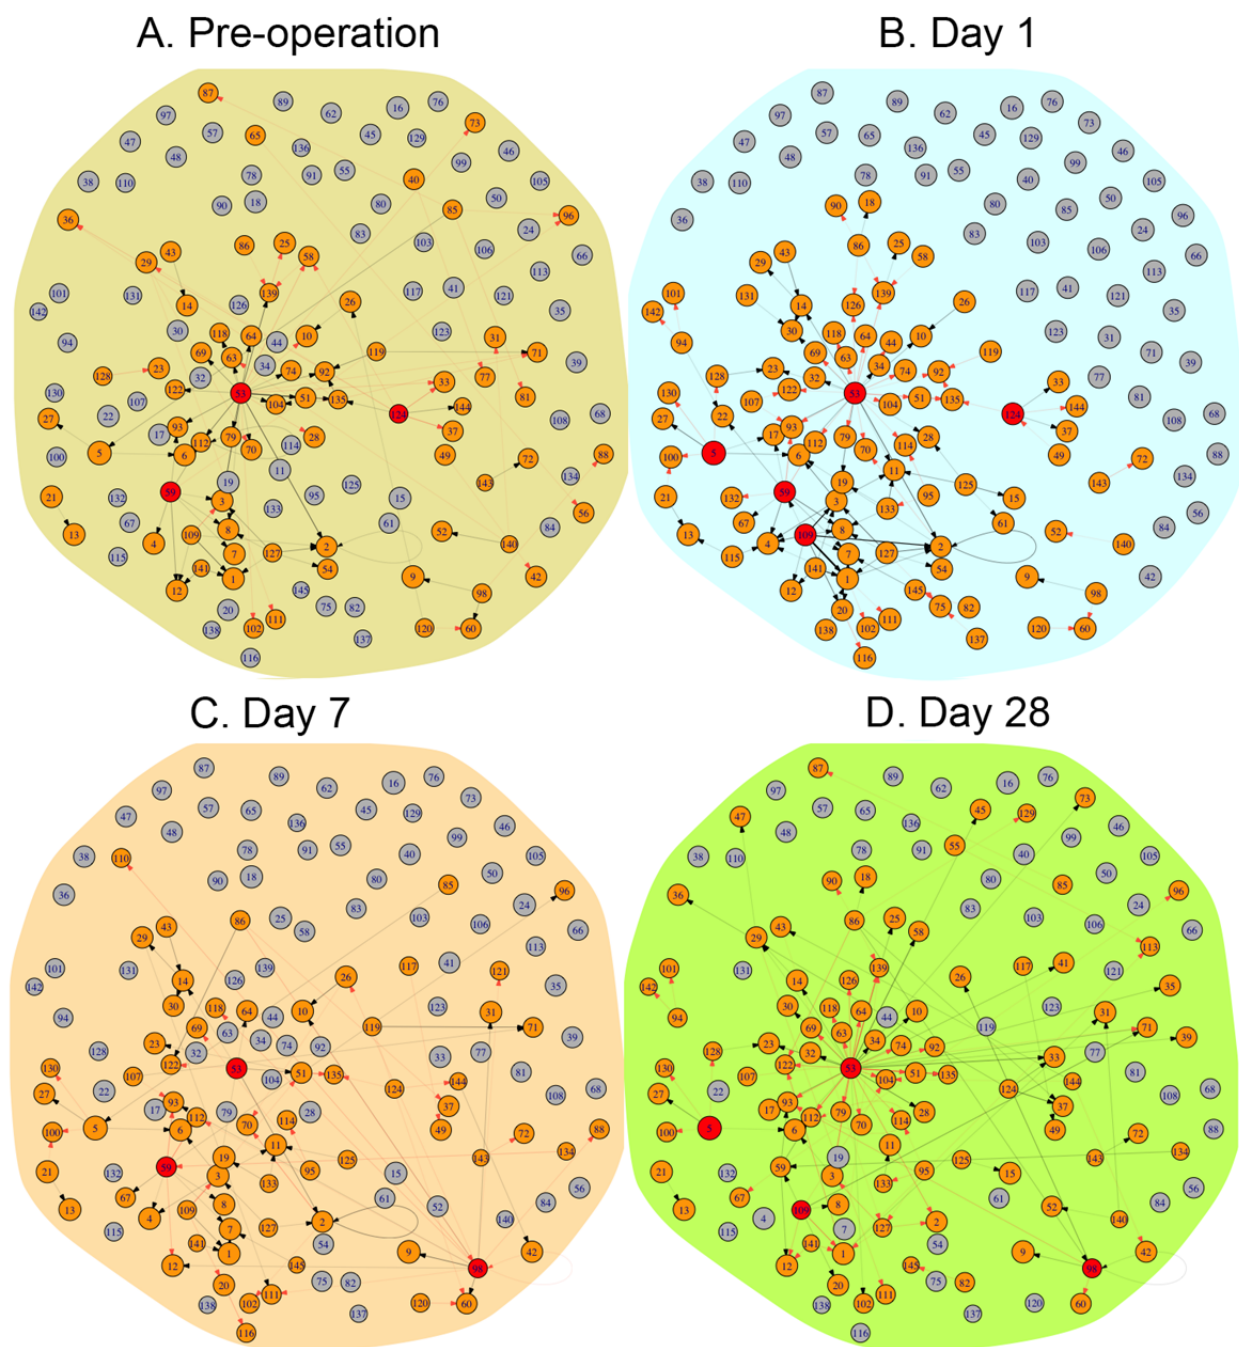

777  
778  
779  
780  
781  
782

**Figure 4**

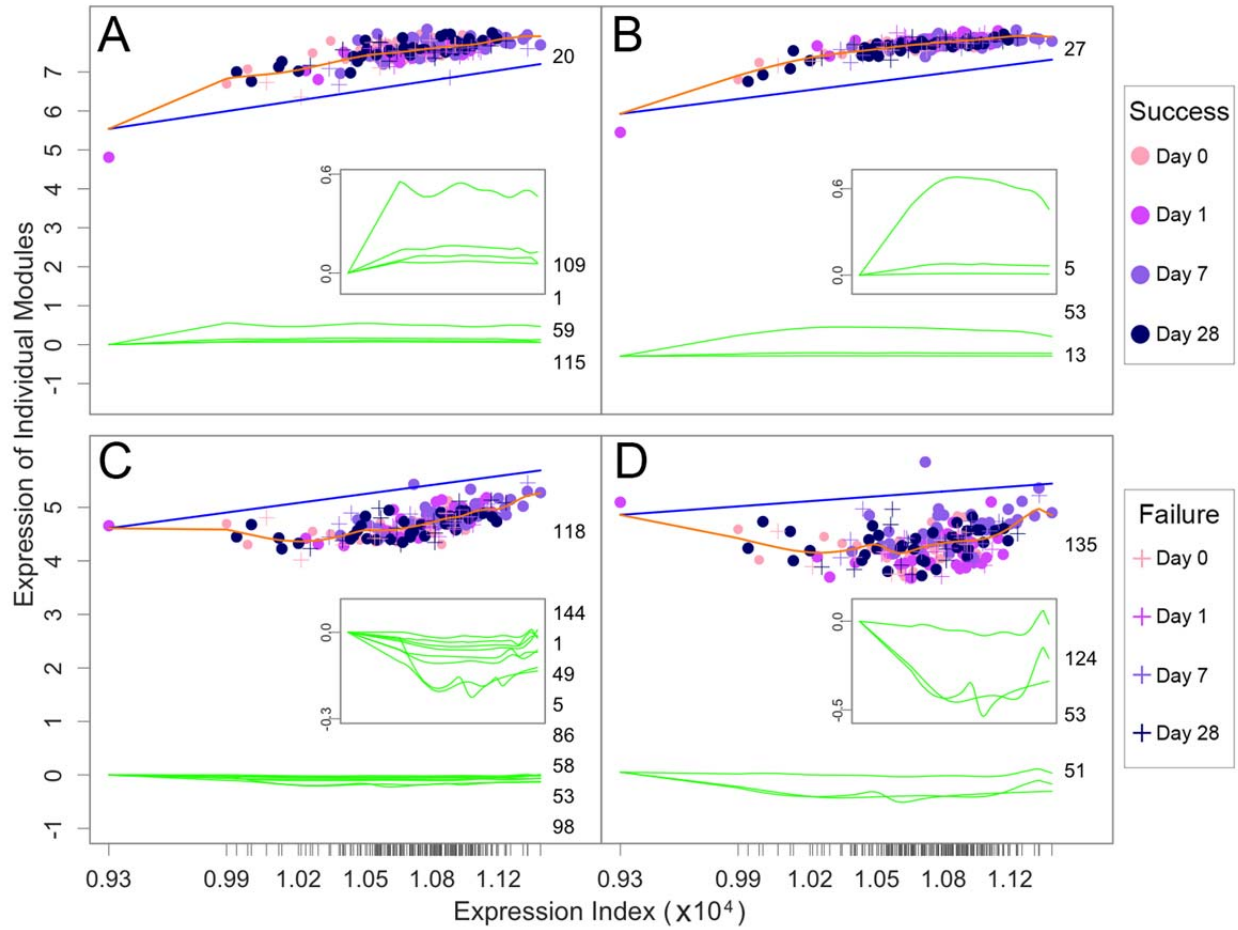

783  
784  
785  
786  
787  
788

**Figure 5**

## 789 **Supplementary Figure Legends**

790

791 **Figure S1.** The fitness of a power equation as a function of expression index (EI) (green line) to  
792 the observed expression levels of four genes, BC011754 (**A**), AB007963 (**B**), BC016908 (**C**),  
793 and NM\_005103 (**D**) across 73 rabbit samples. Samples include three to six rabbits under each of  
794 two blood flows, low (purple circles) and high (dark circles), measured at each of eight time  
795 points (hour 2 and days 1, 3, 7, 14, 30, 90, and 180) post-operation. Ticks on the x-axis represent  
796 the positions of each sample in terms of its EI.

797

798 **Figure S2.** Development-perturbed networks at the module level under low flow (upper panel)  
799 and high flow (lower panel) of rabbit vein grafting experiment in response to developmental  
800 stimuli from hour 2 to day 1 (**A**), day 30 (**B**), and 180 (**C**) post-operation. Numbers in small  
801 circles (each denoted as a node of the graph) represent module IDs. Red and black arrows denote  
802 the direction by a gene promotes and inhibits other genes, respectively, and the thickness of an  
803 arrowed line is proportional to the strength of promotion or inhibition. A proportion of modules  
804 are unlinked, suggesting that they are neutral to each other and other linked genes. Dark red  
805 circles denote hub modules with higher connectivity than the average number of links among all  
806 modules.

807

808 **Figure S3.** Flow-perturbed networks at the module level from slow to high flows of grafted  
809 rabbits at hour 2 (**A**), day 1 (**B**), day 30 (**C**), and day 180 (**D**) post-operation. Numbers in small  
810 circles (each denoted as a node of the graph) represent module IDs. Red and black arrows denote  
811 the direction by a gene promotes and inhibits other genes, respectively, and the thickness of an  
812 arrowed line is proportional to the strength of promotion or inhibition. A proportion of modules  
813 are unlinked, suggesting that they are neutral to each other and other linked genes. Dark red  
814 circles denote hub modules with higher connectivity than the average number of links among all  
815 modules.

816

817 **Figure S4.** Overall fitted curves of gene expression (orange line) from modules 3 (**A**), 20 (**B**), 45  
818 (**C**), and 48 (**D**) by a system of qdODEs as a function of expression index (EI) in the rabbit vein  
819 grafting experiment. Each dot denotes a sample representing a rabbit under a blood flow, low



820 (purple) or high (dark), measured at a time point (hour 2 and days 1, 3, 7, 14, 30, 90, and 180)  
821 post-operation. The overall expression curve of each module is decomposed into its endogenous  
822 expression curve (blue line) and exogenous expression curves (green lines) exerted by a set of  
823 other modules (listed by IDs). Exogenous expression curves are better displayed by a small plot  
824 within each large plot. Value 0 at y-axis is a cut-off point that describes how a focal module is  
825 regulated by other modules: Greater than 0 for promotion, less than 0 for inhibition, and zero for  
826 neutrality. Ticks on the x-axis represent the positions of each sample in terms of its EI.

827

828

829 Table S1 Statistical properties of idopGRN reconstruction under different simulation scenarios.  
 830 Numbers in parentheses are the standard deviations.

831

| Sample size<br>( <i>n</i> ) | Var/Corr<br>$\sigma^2/\rho$ | TP           | FP           | TPR           | FPR           | AUC           |
|-----------------------------|-----------------------------|--------------|--------------|---------------|---------------|---------------|
| 50                          | 0.1/0.3                     | 8.85 (0.41)  | 84.61 (2.41) | 0.738 (0.101) | 0.034 (0.007) | 0.852 (0.051) |
|                             | 0.1/0.0                     | 8.89 (0.42)  | 84.58 (2.41) | 0.741 (0.102) | 0.034 (0.006) | 0.853 (0.051) |
|                             | 1.0/0.3                     | 6.015 (0.33) | 83.76 (2.51) | 0.501 (0.097) | 0.034 (0.007) | 0.734 (0.049) |
|                             | 1.0/0.0                     | 6.03 (0.34)  | 83.74 (2.49) | 0.503 (0.111) | 0.034 (0.006) | 0.734 (0.056) |
| 100                         | 0.1/0.3                     | 9.565 (0.44) | 80.96 (2.34) | 0.797 (0.09)  | 0.033 (0.006) | 0.882 (0.046) |
|                             | 0.1/0.0                     | 9.705 (0.45) | 82.73 (2.37) | 0.809 (0.094) | 0.033 (0.006) | 0.888 (0.047) |
|                             | 1.0/0.3                     | 7.245 (0.37) | 90.76 (2.67) | 0.604 (0.102) | 0.036 (0.006) | 0.784 (0.051) |
|                             | 1.0/0.0                     | 7.18 (0.36)  | 90.52 (2.66) | 0.598 (0.104) | 0.036 (0.007) | 0.781 (0.052) |
| 200                         | 0.1/0.3                     | 10.45 (0.48) | 78.45 (2.29) | 0.871 (0.083) | 0.032 (0.005) | 0.92 (0.042)  |
|                             | 0.1/0.0                     | 10.35 (0.47) | 78.36 (2.29) | 0.863 (0.09)  | 0.031 (0.005) | 0.916 (0.045) |
|                             | 1.0/0.3                     | 8.285 (0.39) | 91.63 (2.68) | 0.690 (0.092) | 0.037 (0.006) | 0.827 (0.046) |
|                             | 1.0/0.0                     | 8.31 (0.39)  | 91.15 (2.65) | 0.693 (0.101) | 0.037 (0.006) | 0.828 (0.051) |

832

833 TP: true positive; FP: false positive; TN: true negative; FN: false negative (FN); TPR: true  
 834 positive rates; TPR: false positive rates; AUC: area under the curve.
